# Supplementary material
Source: publisher figshare collection journal article supplement (https://frontiersin.figshare.com/ndownloader/files/22914188)
Supplement: Supplementary file [file 22914188]

**Novel quinazolin-2,4-dione hybrid molecules as possible inhibitors against  
Malaria: Synthesis and In silico molecular docking studies**

Aboubakr Haredi Abdelmonsef <sup>1\*</sup>, Mahmoud Eldeeb Mohamed <sup>1</sup>, Mohamed El-Naggar <sup>2</sup>, Hussain Temairk <sup>1</sup>, Ahmed Mohamed Mosallam <sup>1</sup>

<sup>1</sup>Chemistry Department, Faculty of Science, South Valley University, 83523 Qena,  
Egypt

<sup>2</sup>Chemistry Department, Faculty of Sciences, University of Sharjah, 27272 Sharjah,  
UAE

\*Email: [aboubakr.ahmed@sci.svu.edu.eg](mailto:aboubakr.ahmed@sci.svu.edu.eg)

**Figure S1. Three- dimensional structure of the target enzyme *pfDHODH***

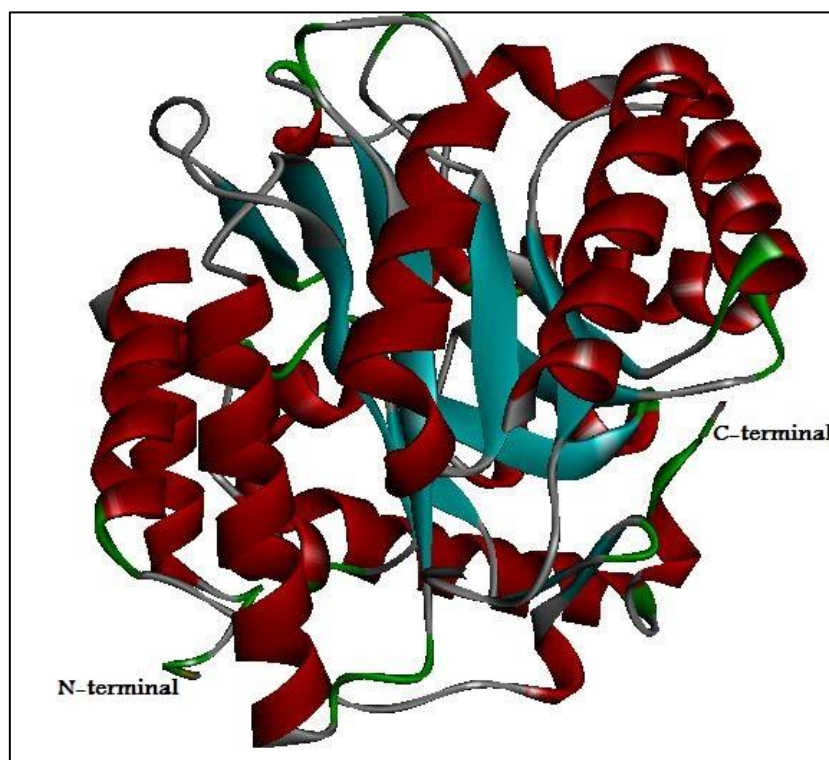

The X-ray crystal structure of enzyme obtained from RCSB Protein Data Bank

**Figure S2. Three- dimensional structures of the docked molecules**

**Compound 1**

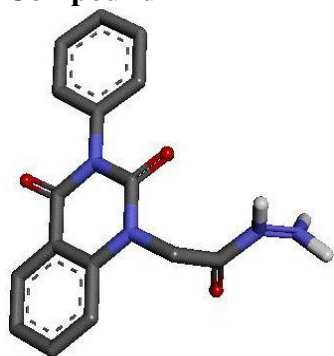

**Compound 2a**

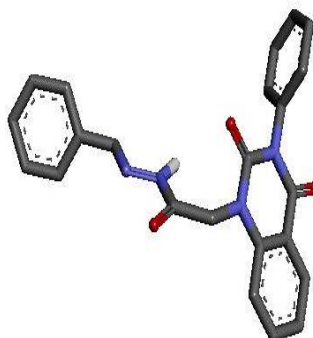

**Compound 2b**

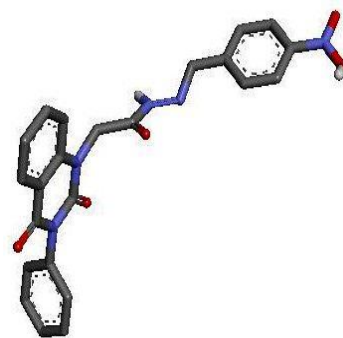

**Compound 2c**

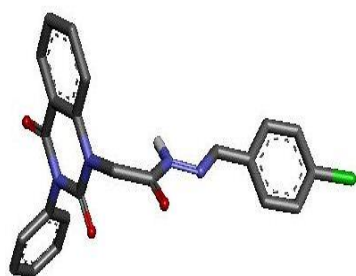

**Compound 2d**

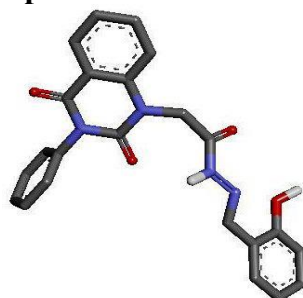

**Compound 2e**

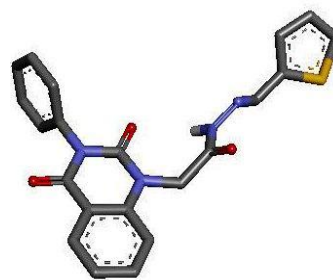

**Compound 3a**

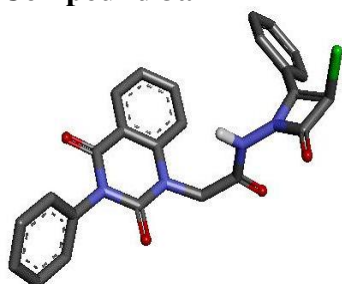

**Compound 4a**

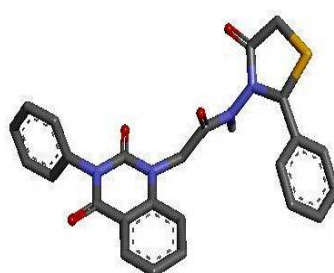

**Compound 5**

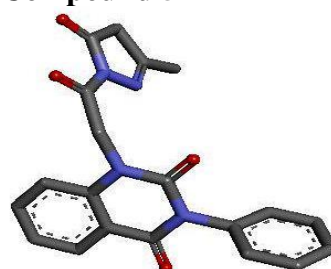

**Compound 6**

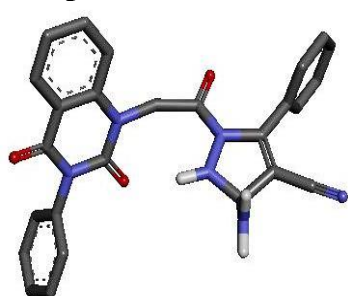

**Compound 7**

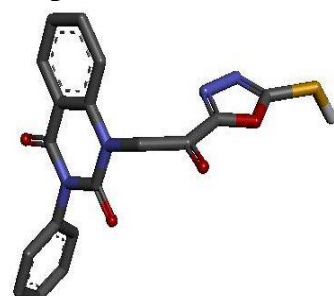

**Compound 8**

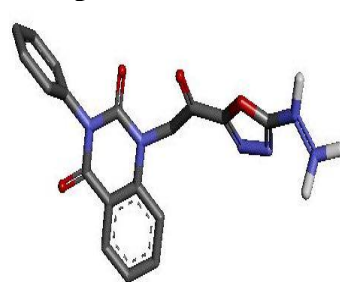

**Compound 9**

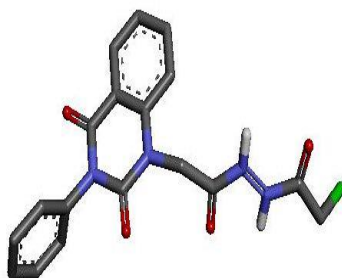

**Compound 10**

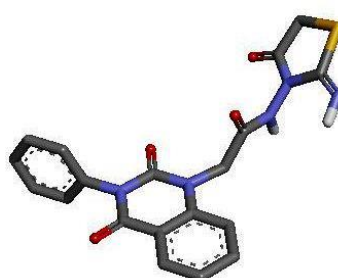

**Compound 11**

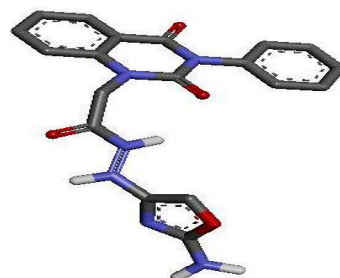

**Compound 12**

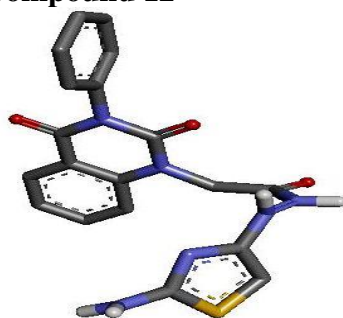

**Compound 13**

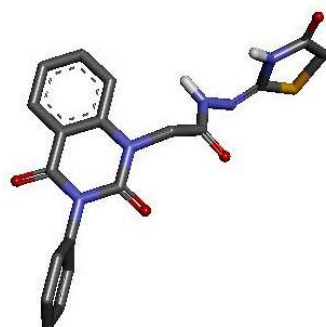

**Compound 14**

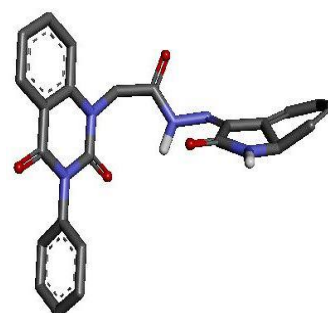

**Compound 15**

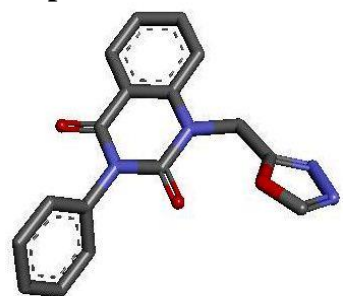

**Compound 16a**

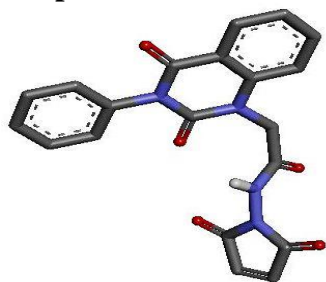

**Compound 16b**

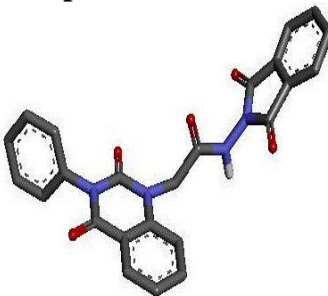

**Compound 16c**

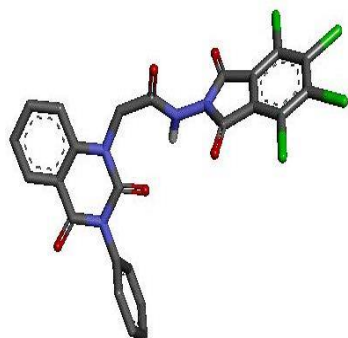



**Figure S3. Molecular interactions between the rest compounds and *p*/DHODH**

**Compound 2a**

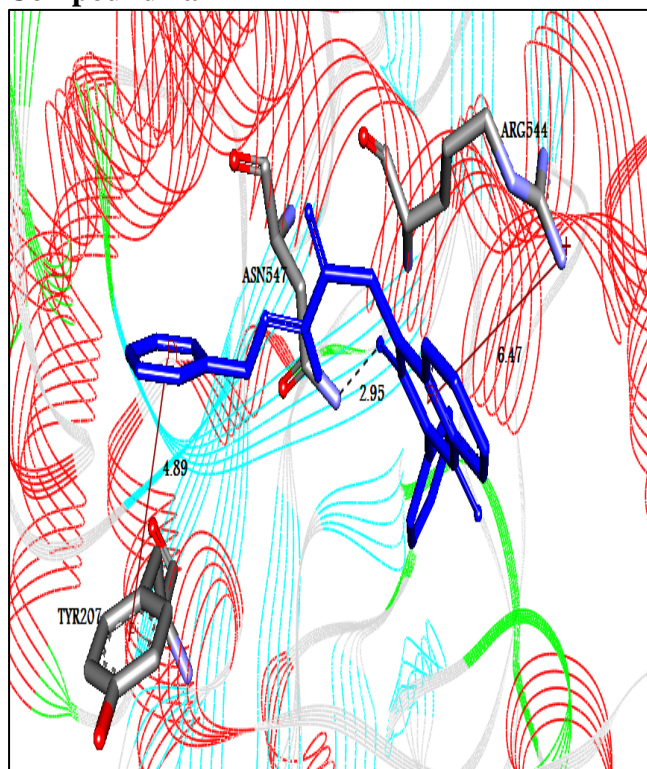

**Compound 2b**

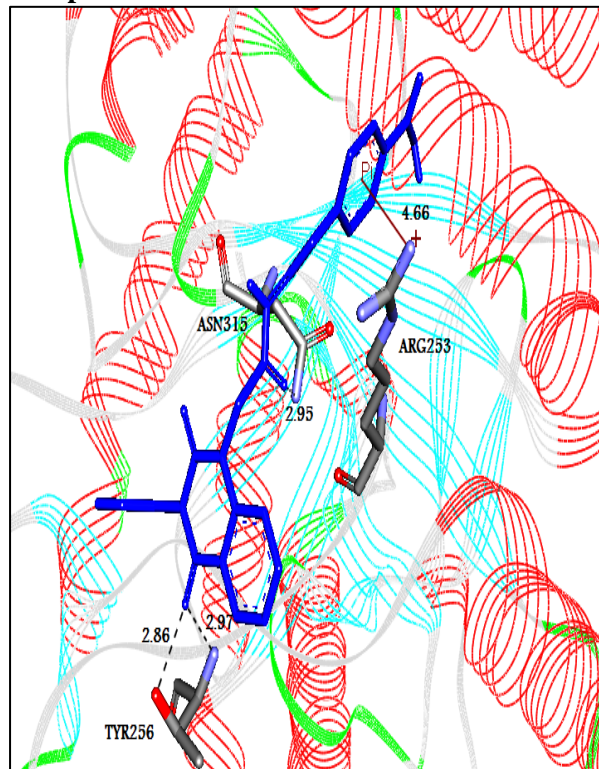

**Compound 2c**

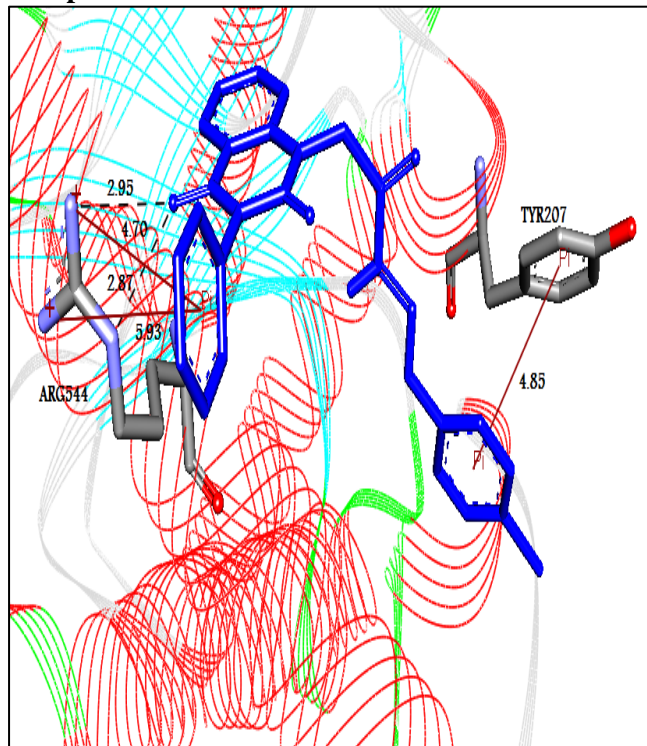

**Compound 2e**

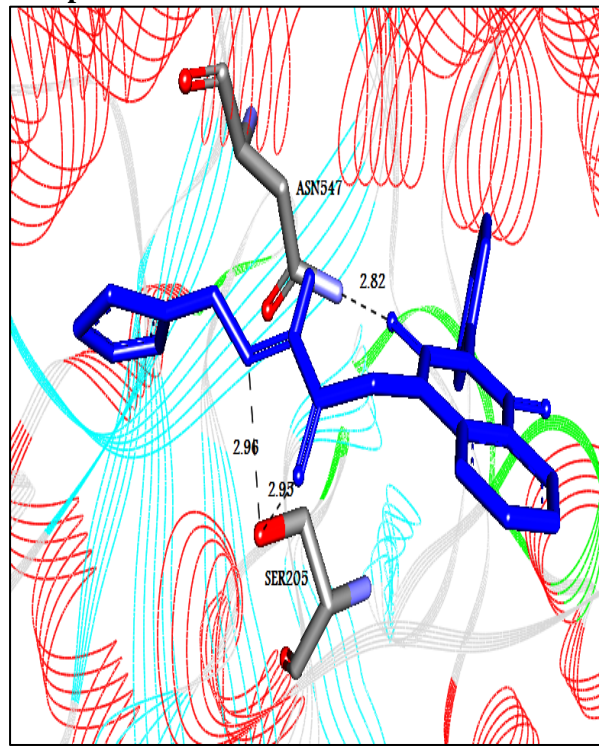

**Compound 3a**

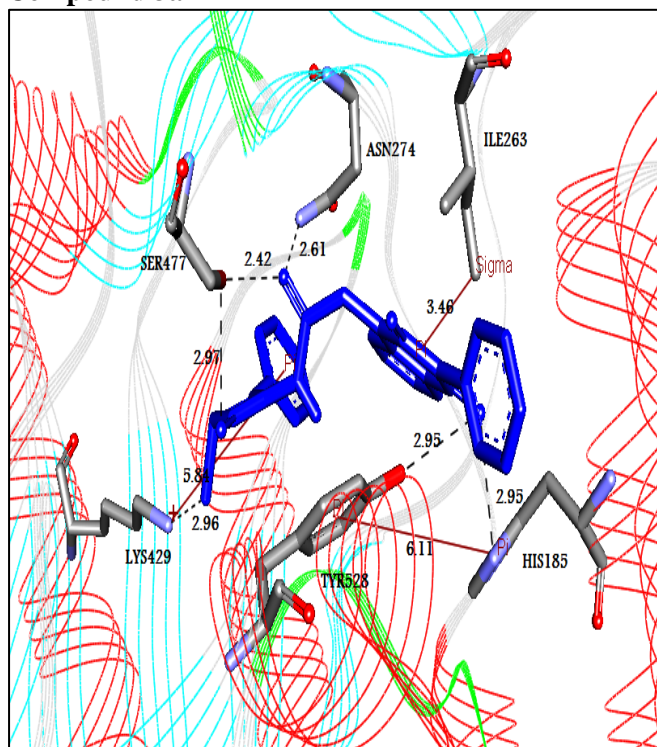

**Compound 4a**

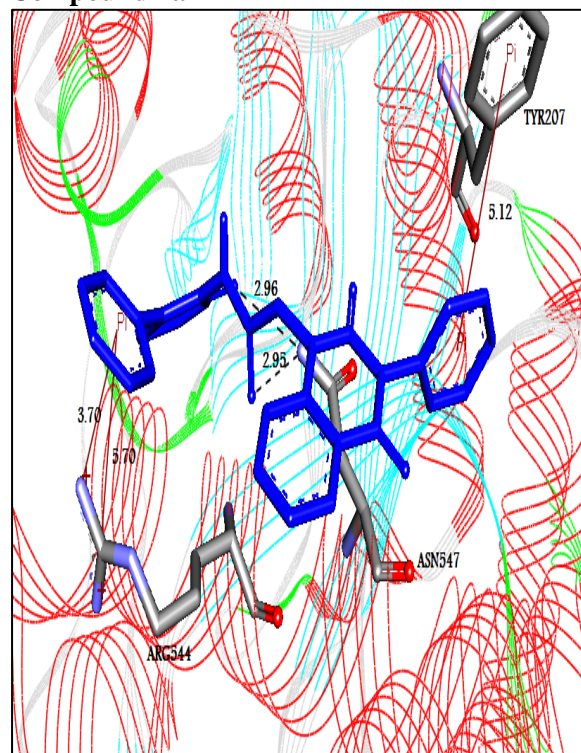

**Compound 5**

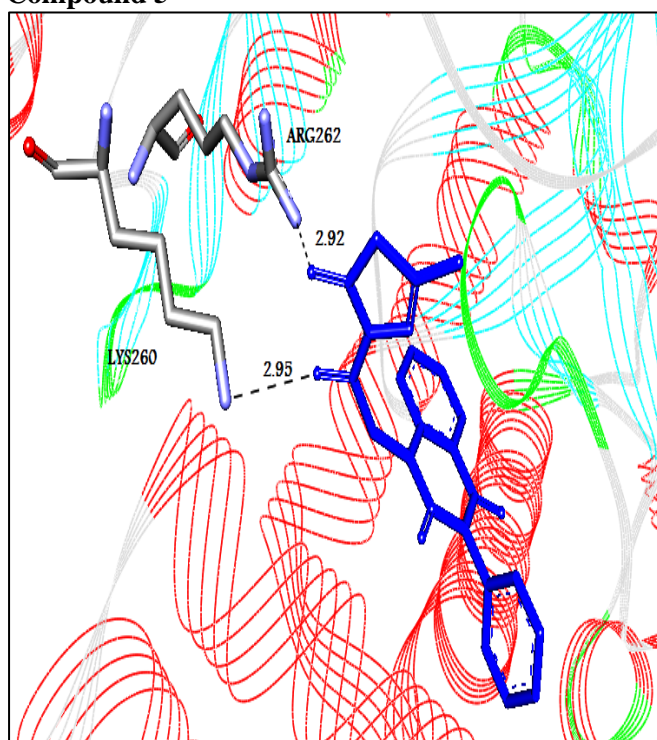

**Compound 6**

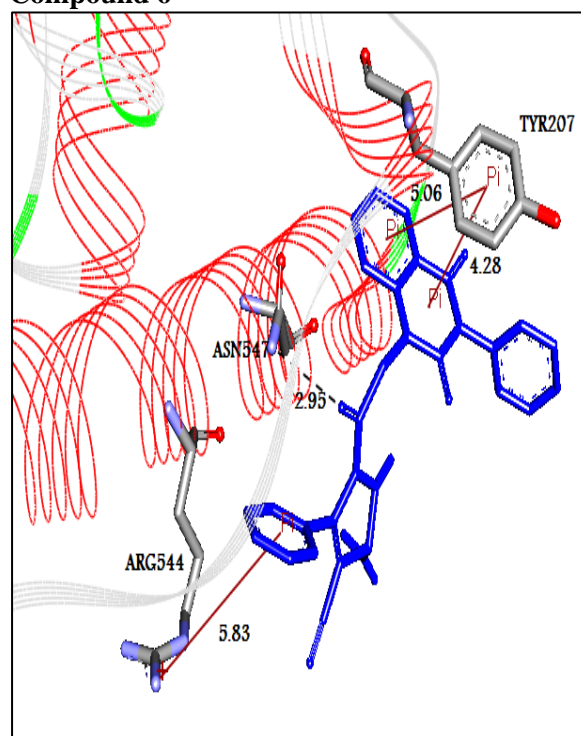



**Compound 7**

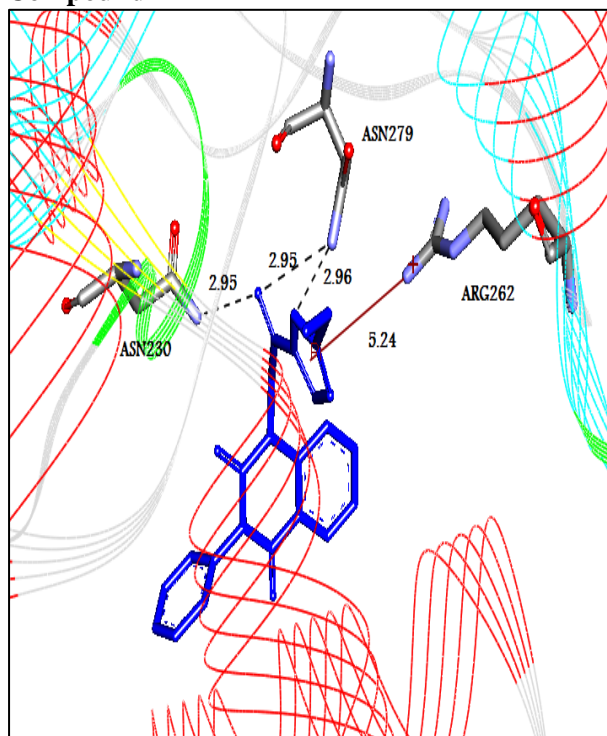

**Compound 8**

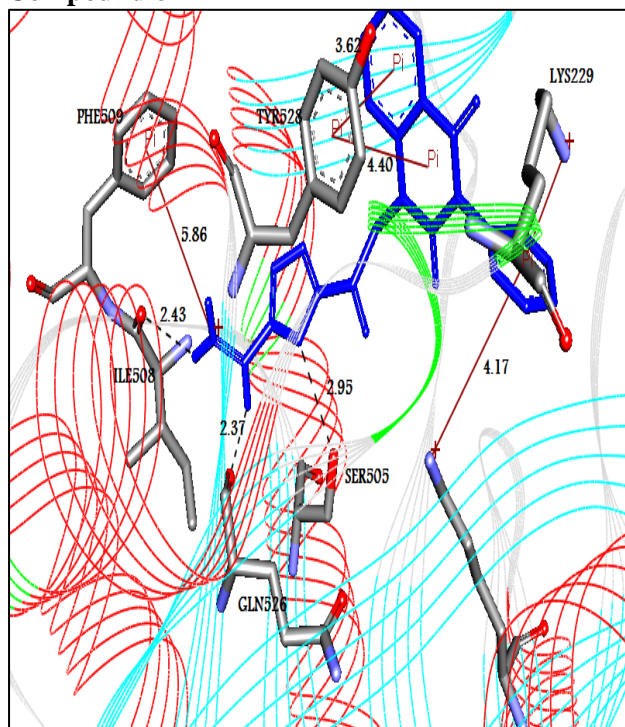

**Compound 9**

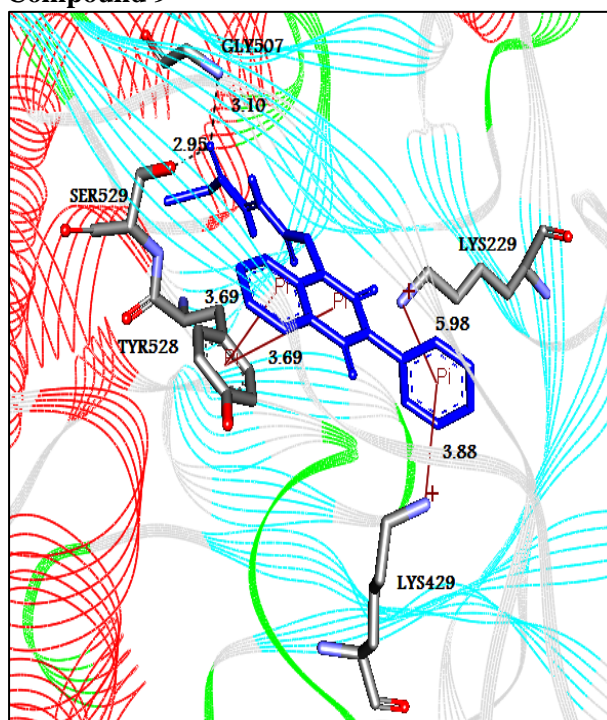

**Compound 10**

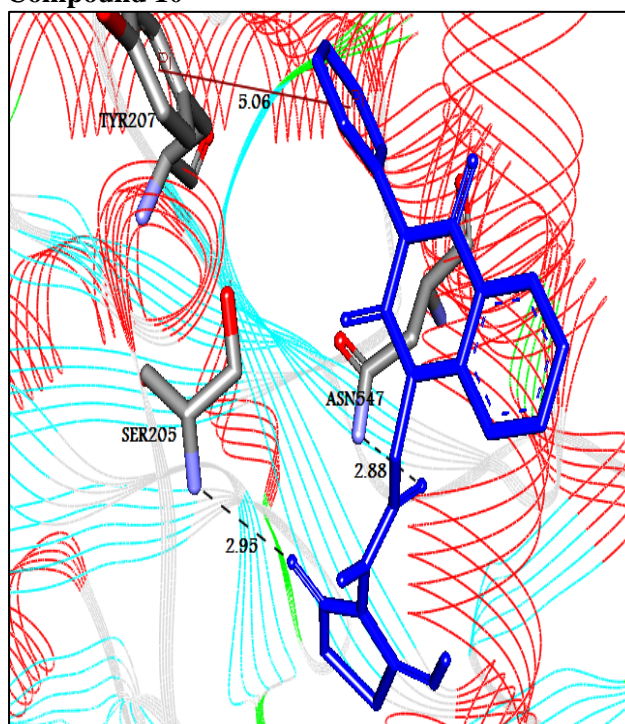

**Compound 12**

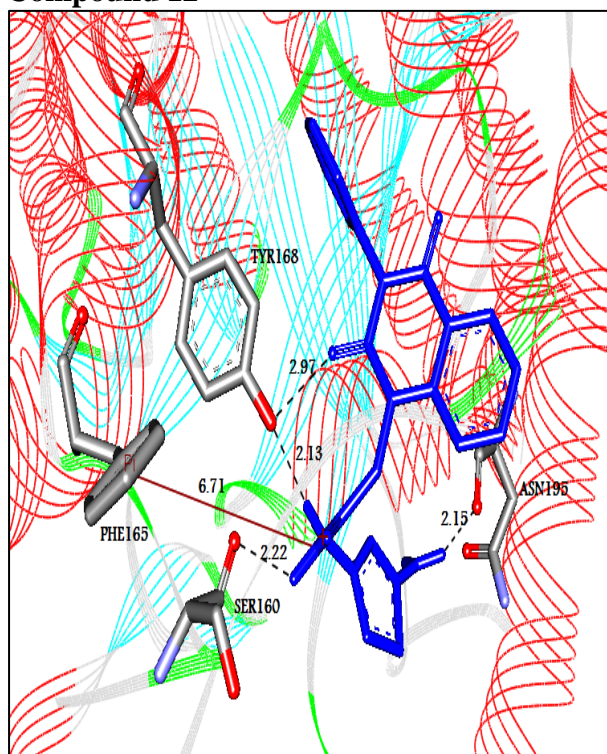

**Compound 13**

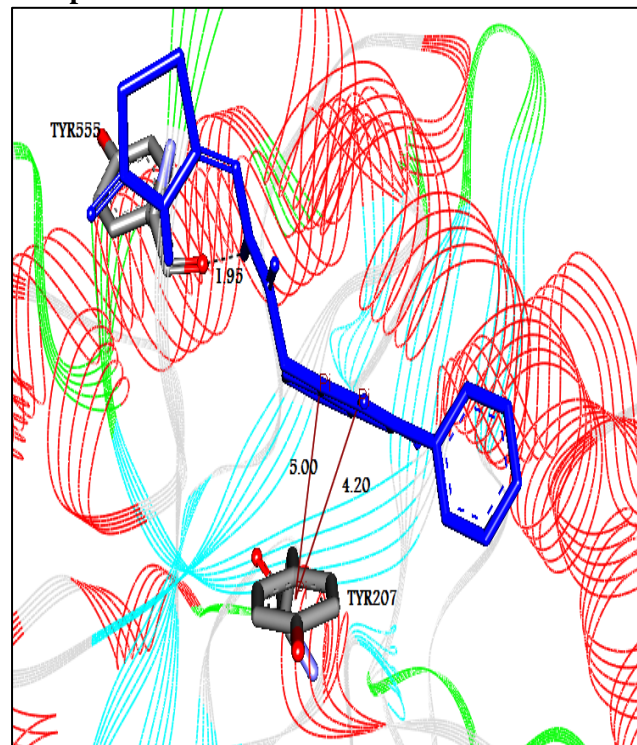

**Compound 14**

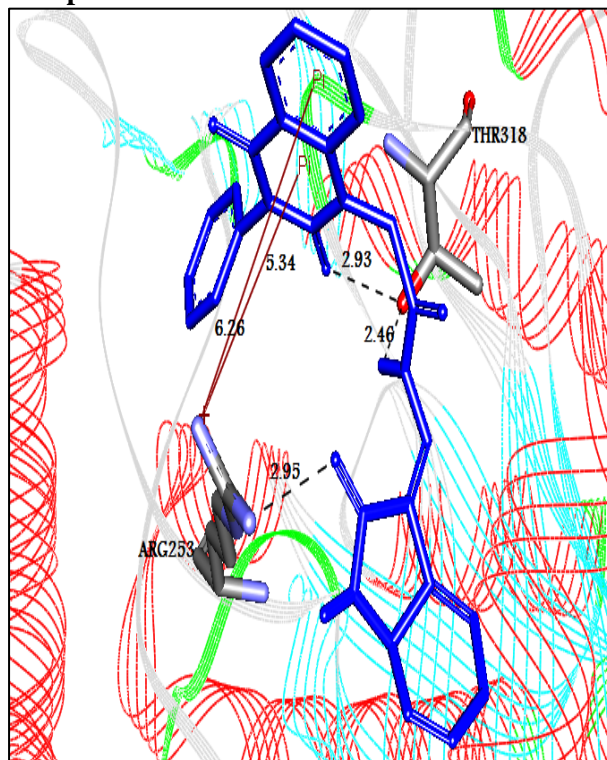

**Compound 15**

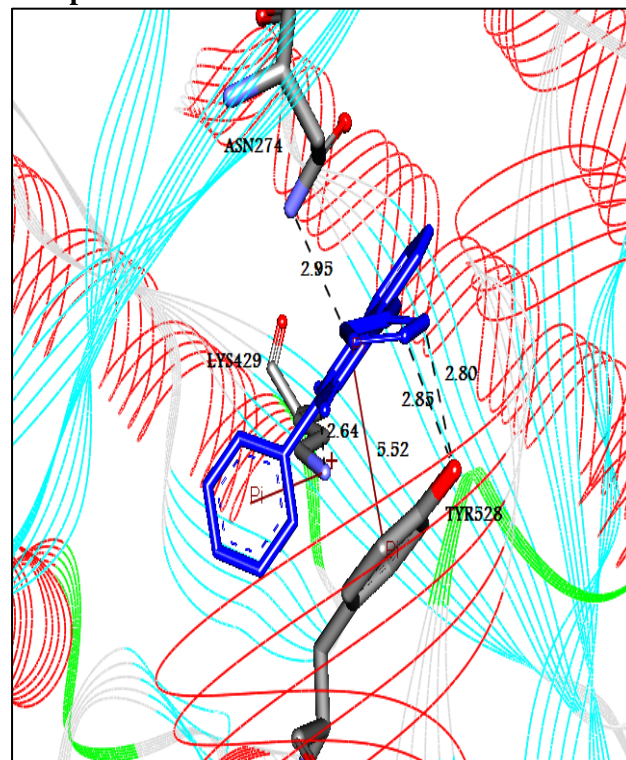



**Compound 16a**

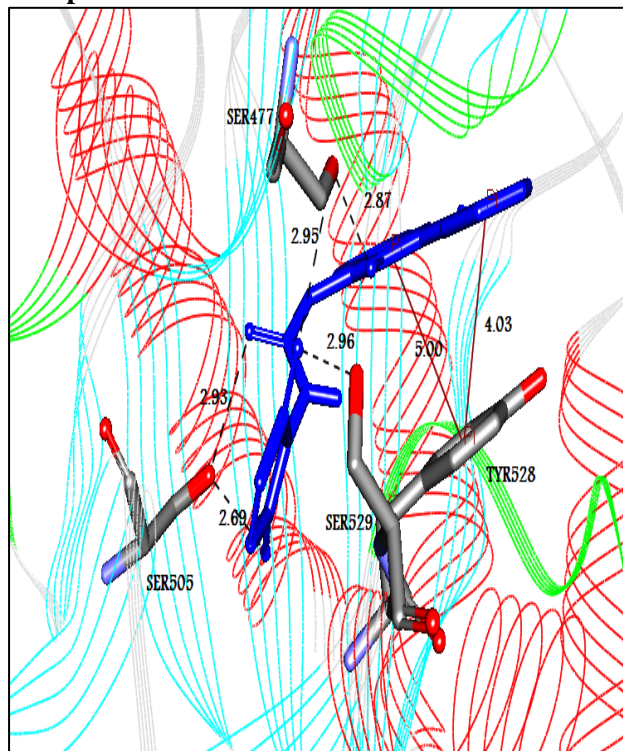

**Compound 16b**

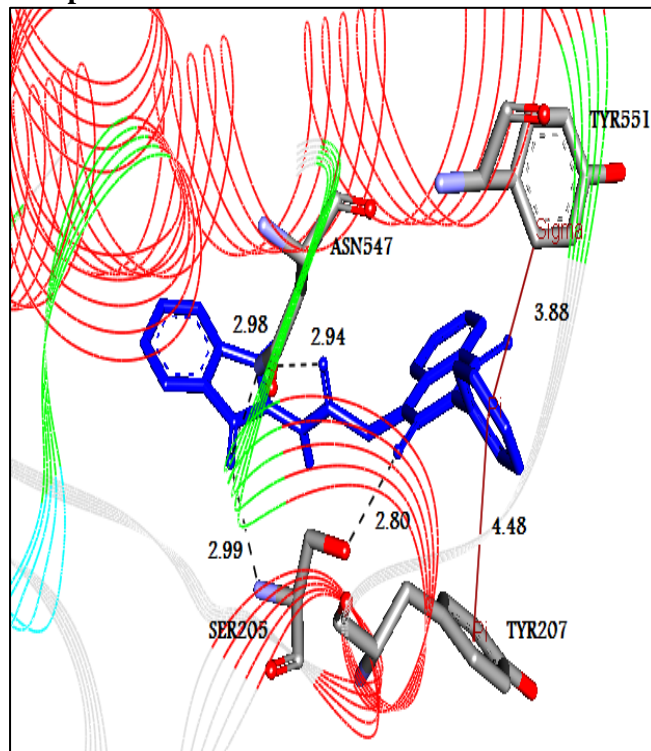

**Compound 16c**

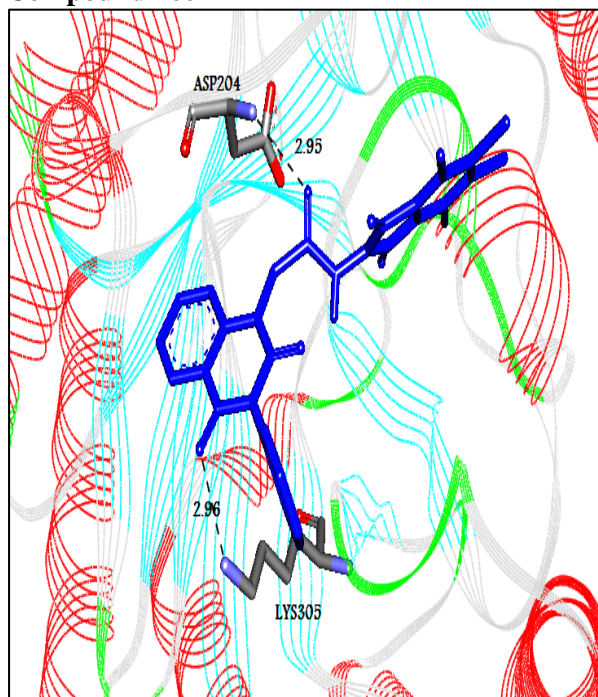

Three-dimensional of docking pose of the rest compounds in the active pocket of *pfDHODH*. Blue stick models represented the docked compounds, and gray models represented the active site region. H-bond interactions are shown in black dotted lines.  $\pi$ - interactions are shown in brown lines.



**Figure S4.** The electrostatic potential maps of the rest compounds.

**Compound 2a**

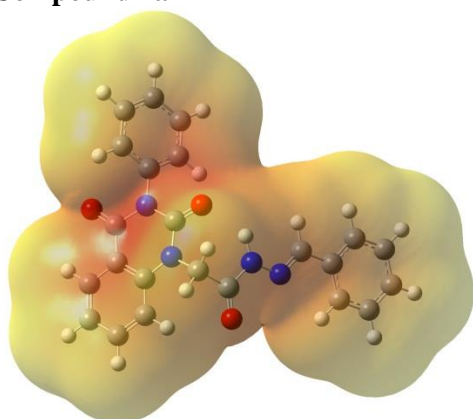

**Compound 2b**

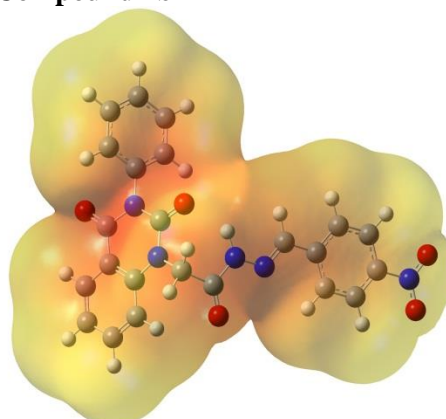

**Compound 2c**

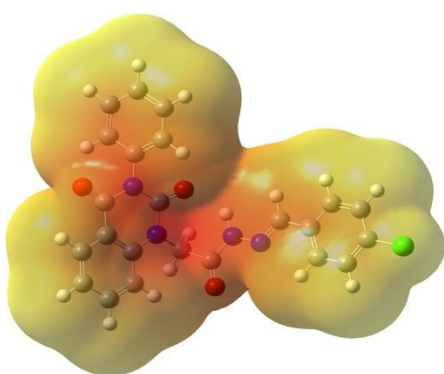

**Compound 2e**

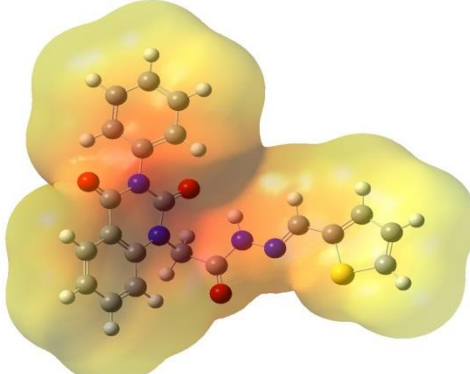

**Compound 3a**

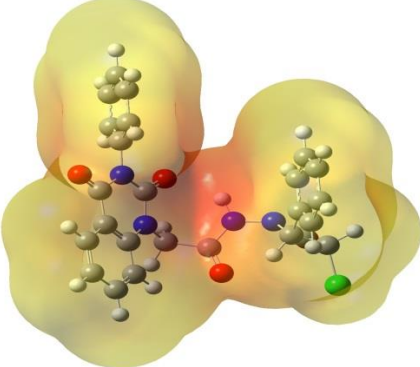

**Compound 4a**

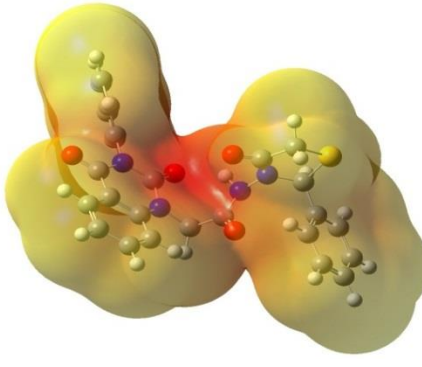

**Compound 5**

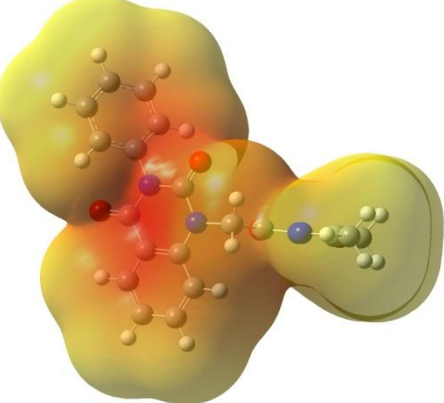

**Compound 6**

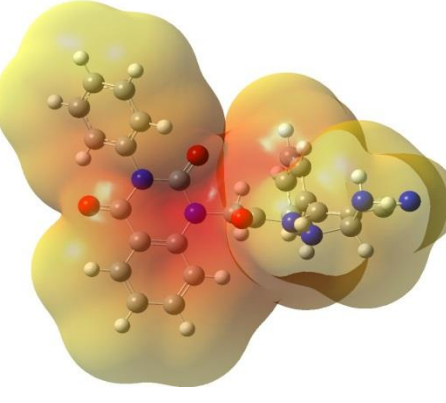

**Compound 7**

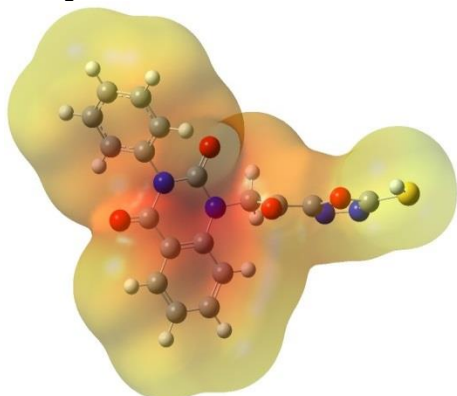

**Compound 8**

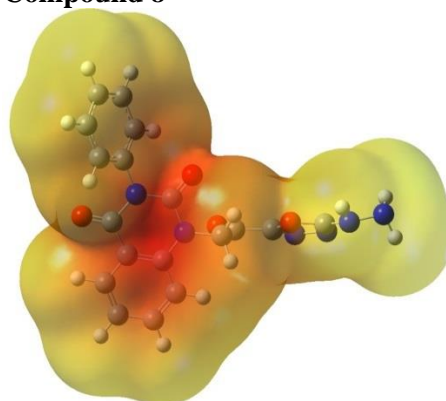

**Compound 9**

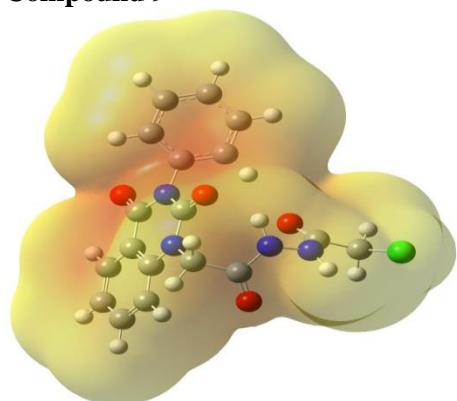

**Compound 10**

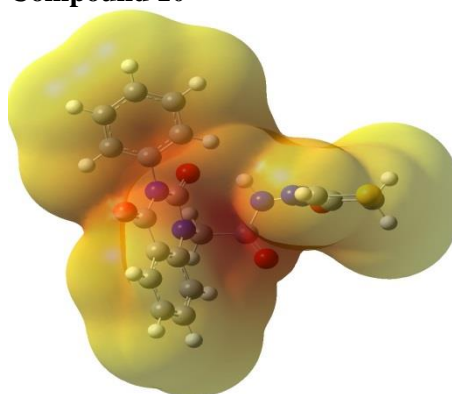

**Compound 12**

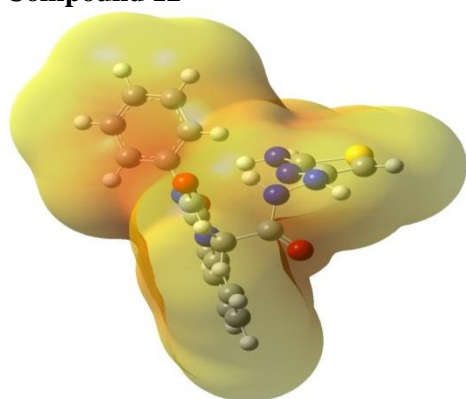

**Compound 13**

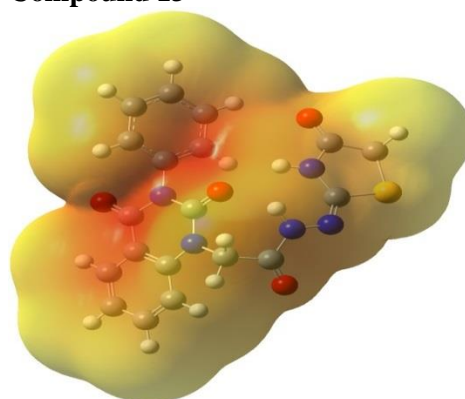

**Compound 14**

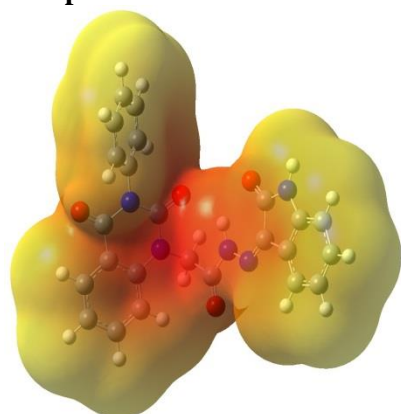

**Compound 15**

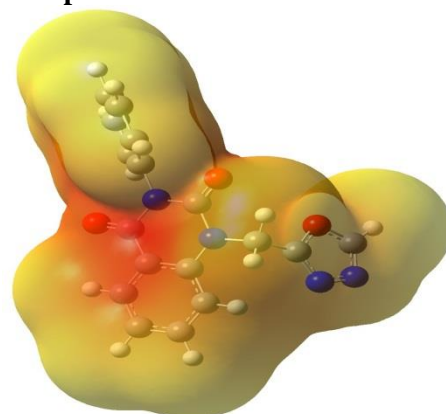

**Compound 16a**

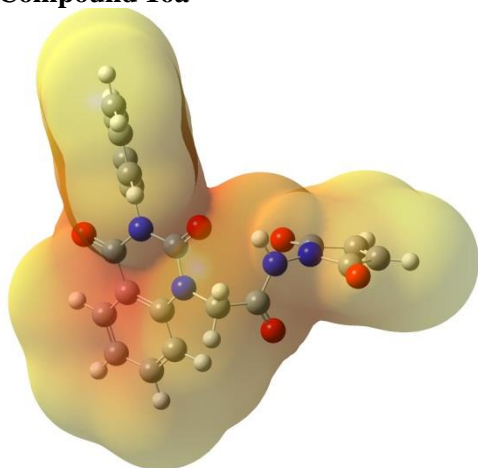

**Compound 16b**

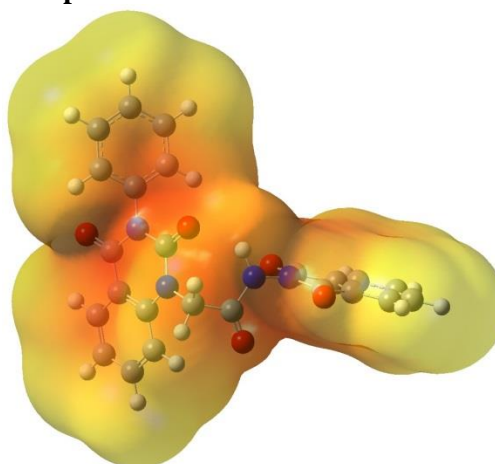

**Compound 16c**

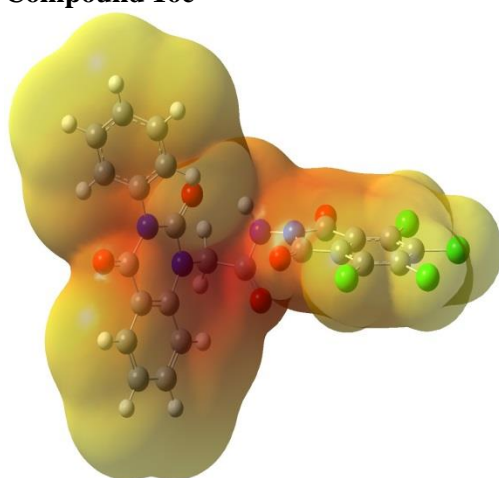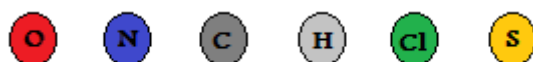

Electrostatic potential maps around the rest compounds. The red region represents highly electron density charges (electronegative), while pale yellow represents electropositive part.



**Table S1. The protonation states of the amino acid residues of *pf*DHODH.**

| <b>Residue</b> | <b>pKa</b> |
|----------------|------------|
| ASP204         | 3.97       |
| HIS185         | 4.36       |
| TYR168         | 11.06      |
| TYR207         | 10.10      |
| TYR528         | 13.80      |
| TYR551         | 10.06      |
| TYR555         | 12.03      |
| LYS229         | 9.26       |
| LYS260         | 10.74      |
| LYS305         | 10.43      |
| LYS429         | 8.95       |
| ARG253         | 12.51      |
| ARG262         | 13.68      |
| ARG544         | 13.58      |
